# Supplementary material
Source: publisher site journal article supplement (https://www.dovepress.com/get_supplementary_file.php?f=257477.docx)
Supplement: Supplementary file 1 [file get_supplementary_file.php]

Table1 Antibiotic resistance information

| Strain number | Levofloxacin | Imipenem | Tobramycin | Cefazolin | Cefoxitin | Ceftazidime | Cefotaxime | Cefoperazone Sulbactam | Cefepime | Tigecycline | Gentamicin | Piperacillin tazobactam | Piperacillin | Meropenem | Ciprofloxacin | Sulfamethoxazole | Polymyxin | Aztreonam | Amikacin | Ceftazidime avibatan |
| --- | --- | --- | --- | --- | --- | --- | --- | --- | --- | --- | --- | --- | --- | --- | --- | --- | --- | --- | --- | --- |
| A18 | R | R | R | R | R | R | R | R | R | R | R | R | R | R | R | R | R | R | R | R |
| 15 | R | R | R | R | R | R | R | R | R | R | R | R | R | R | R | R | S | R | R | R |
| XY5 | R | R | R | R | R | R | R | R | R | R | R | R | R | R | R | R | R | R | R | R |
| FZ1 | R | R | R | R | R | R | R | R | R | R | R | R | R | R | R | R | S | R | R | R |
| 21 | R | R | R | R | R | R | R | R | R | R | R | R | R | R | R | R | R | R | R | R |
| GZ20 | R | R | R | R | R | R | R | R | R | S | R | R | R | R | R | R | S | R | R | R |
| 356 | R | R | R | R | R | R | R | R | R | R | R | R | R | R | R | R | S | R | S | R |
| A22 | R | R | R | R | R | R | R | R | R | R | R | R | R | R | R | R | R | R | R | R |
| GZ19 | R | R | R | R | R | R | R | R | R | S | R | R | R | R | R | R | S | R | R | R |
| JDZ25 | R | R | R | R | R | R | R | R | R | R | R | R | R | R | R | R | R | R | R | R |
| 29 | R | R | R | R | R | R | R | S | R | S | R | R | R | R | R | R | S | R | R | R |
| 31 | R | S | R | R | R | R | R | R | R | S | R | R | R | S | R | R | S | R | S | R |
| FZ2 | R | R | R | R | R | R | R | R | R | S | R | R | R | R | R | R | S | R | S | R |
| 30 | R | R | R | R | R | R | R | R | R | S | R | R | R | S | R | R | S | R | R | R |
| 16 | R | R | R | R | R | R | R | S | R | S | R | R | R | R | R | R | S | R | S | R |
| JJ10 | S | R | R | R | R | R | R | S | R | S | R | R | R | S | R | R | S | R | S | R |
| a | R | R | R | R | R | R | R | R | R | S | R | R | R | R | R | R | S | R | S | R |
| 39 | R | R | R | R | R | R | R | R | R | R | R | R | R | R | R | R | S | R | S | R |
| 1 | R | R | R | R | R | R | R | R | R | R | R | R | R | R | R | R | S | R | S | R |


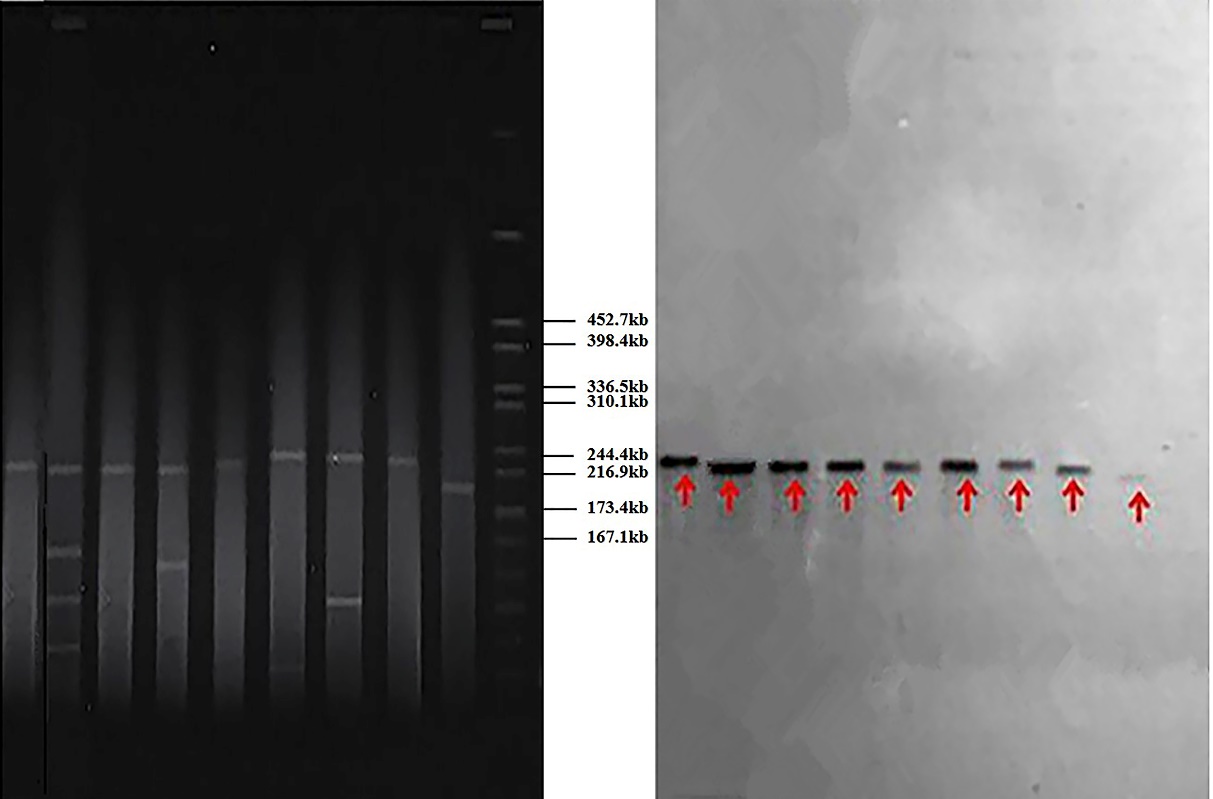


**Supplementary figure 1. S1-PFGE and Southern hybridization of nine ceftazidime/avibactam-resistant hvKP strains in this study**
